# Supplementary material for: Disentangling the multigenic and pleiotropic nature of molecular function
Source: PubMed Central journal article supplement (PMC4674882; doi:10.1186/1752-0509-9-s6-s3), 2015-12-09
Supplement: 1752-0509-9-S6-S3-S1.pdf [file 1752-0509-9-S6-S3-S1.pdf]

**Additional file 1: Table S1:** GO annotations considered too frequent to be informative (>50% of annotations) and removed from the data set.

| <b>GO term</b>                      | <b>% Genes</b> |
|-------------------------------------|----------------|
| Biological process                  | 100            |
| cellular process                    | 93             |
| metabolic process                   | 80             |
| cellular metabolic process          | 77             |
| primary metabolic process           | 77             |
| organic substance metabolic process | 76             |
| single organism process             | 73             |
| single-organism cellular process    | 66             |
