# Supplementary material for: Disentangling the multigenic and pleiotropic nature of molecular function
Source: PubMed Central journal article supplement (PMC4674882; doi:10.1186/1752-0509-9-s6-s3), 2015-12-09
Supplement: 1752-0509-9-S6-S3-S2.pdf [file 1752-0509-9-S6-S3-S2.pdf]

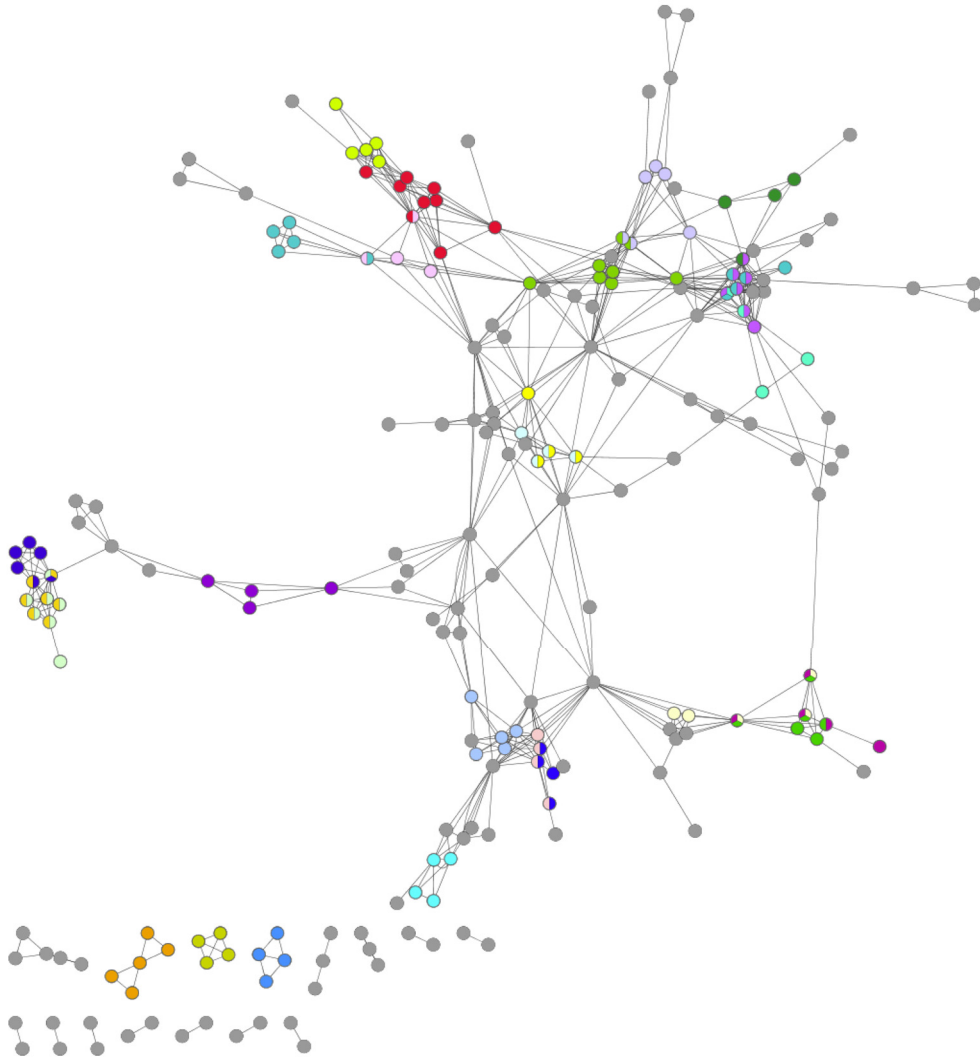

**Additional File 2: Figure S1:** Network clusters created using ONECLUST. The Cytoscape plugin ClusterONE was used to calculate network clusters, using weighted edges and a minimum cluster density of 0.25 to include all the main clusters.
